# Supplementary material for: Amine-based synthesis of Fe3C nanomaterials: mechanism and impact of synthetic conditions
Source: publisher site journal article supplement (doi:10.1515/znb-2021-0134), 2021-11-01
Supplement: Supplementary file 1 [file j_znb-2021-0134_suppl.pdf]

# Supporting Information

**Daniel P. Harris,# Cheng Wan,# Yuqi She, Brittney R. Beck, Daniel S. Forbes, Brian M. Leonard\***

**Amine-based synthesis of Fe<sub>3</sub>C nanomaterials: mechanism and impact of synthetic conditions**

<https://doi.org/10.1515/znb-2021-0134>

Received September 3, 2021, accepted September 22, 2021

**\*Corresponding author: Brian M. Leonard**, Associate Professor, Department of Chemistry

#3838, University of Wyoming, 1000 University Ave., Laramie, WY 82071, USA, e-mail:

bleonar5@uwyo.edu

**Daniel P. Harris, Cheng Wan, Yuqi She, Brittney R. Beck, and Daniel S. Forbes:**

Department of Chemistry #3838, University of Wyoming, 1000 University Ave., Laramie, WY 82071, USA

# These authors contributed equally to this work

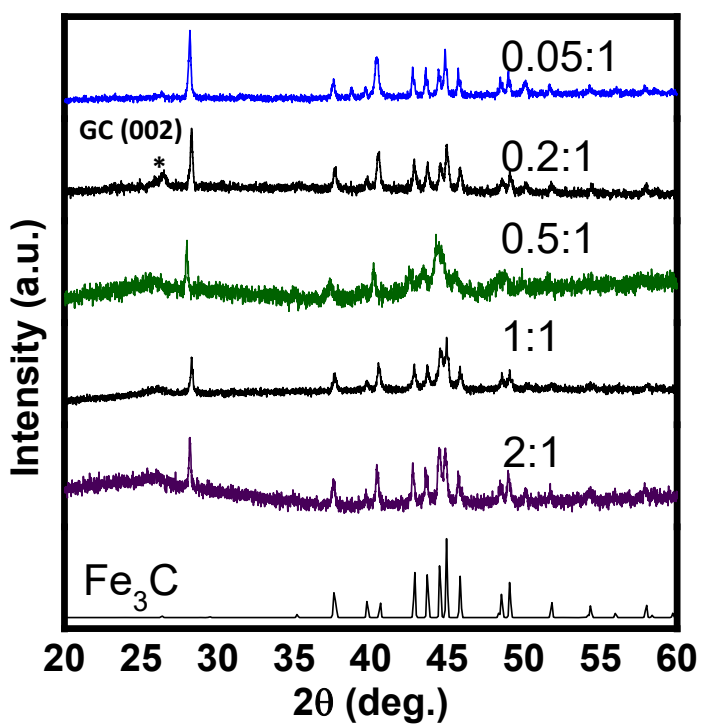

**Figure S1:** XRD patterns of Fe<sub>3</sub>C made from *m*PDA at 750 °C for 0 s dwell time with different Fe : amine ratio (1:2, 1:1, 1:0.5, 1:0.2, and 1:0.05). The reference data at the bottom of the figure for Fe<sub>3</sub>C was reproduced from PDF: 00-006-0688.

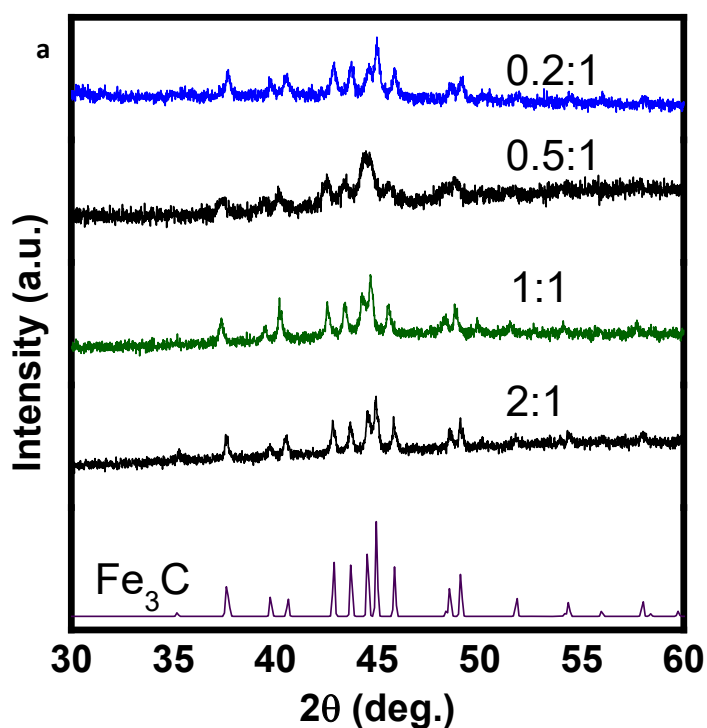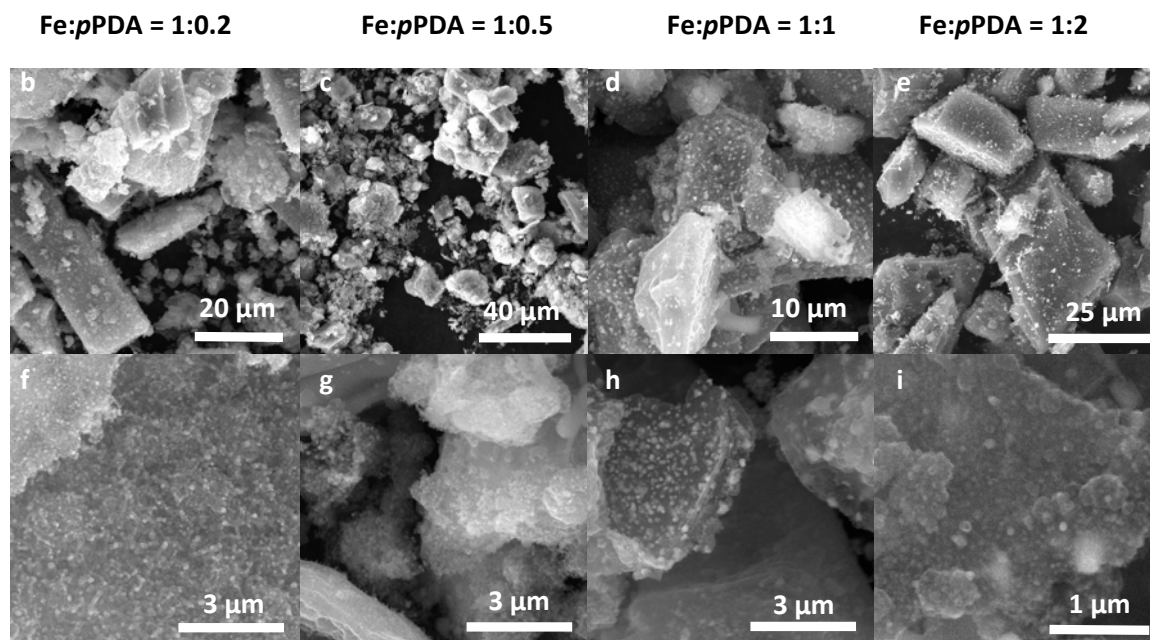

**Figure S2:** XRD patterns (a) and SEM images (b)–(i) of Fe<sub>3</sub>C made from pPDA at 750 °C with a 0 s dwell time with different Fe : amine ratios (1:2, 1:1, 1:0.5, and 1:0.2). The reference data at the bottom of Figure (a) for Fe<sub>3</sub>C was reproduced from PDF: 00-006-0688. (b)–(i) SEM images of the different Fe : amine ratios with low magnification images on the top and high magnification images of the same sample on the bottom.

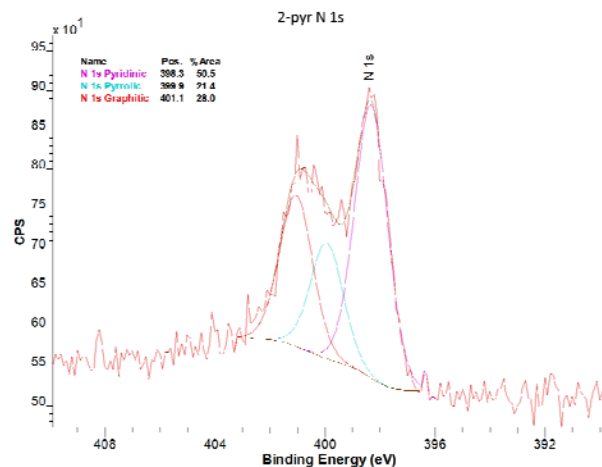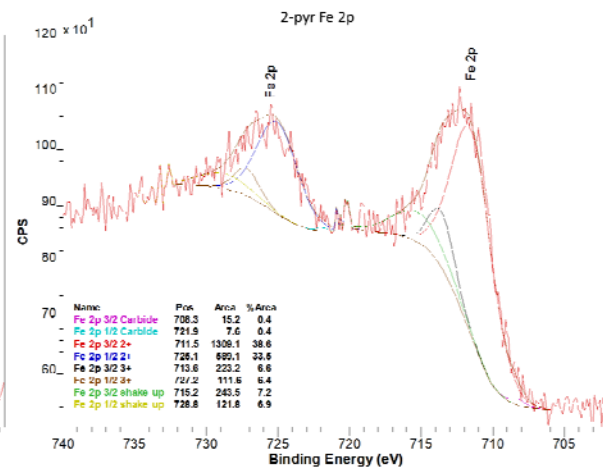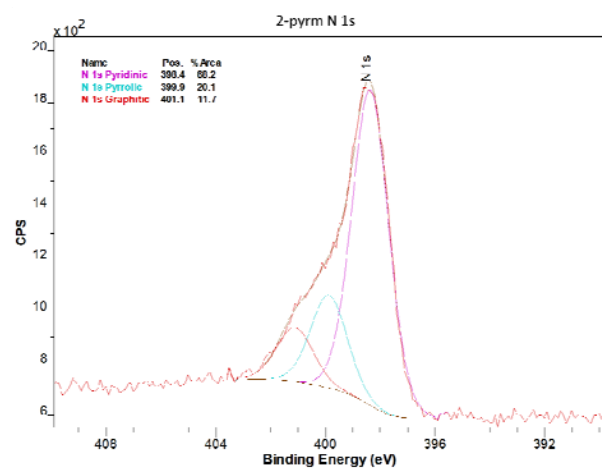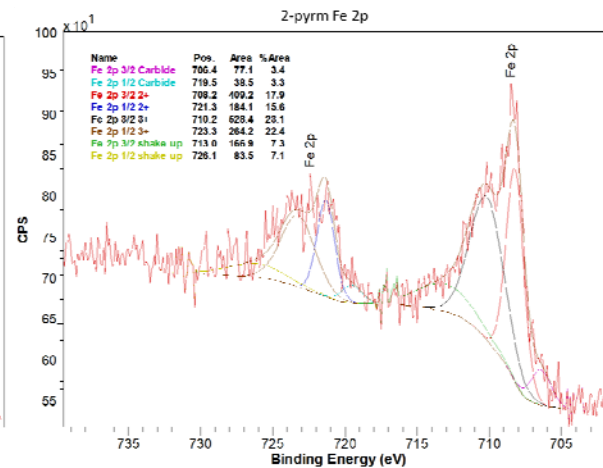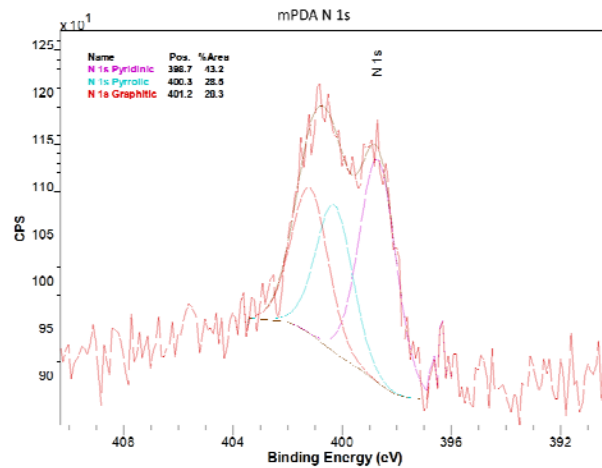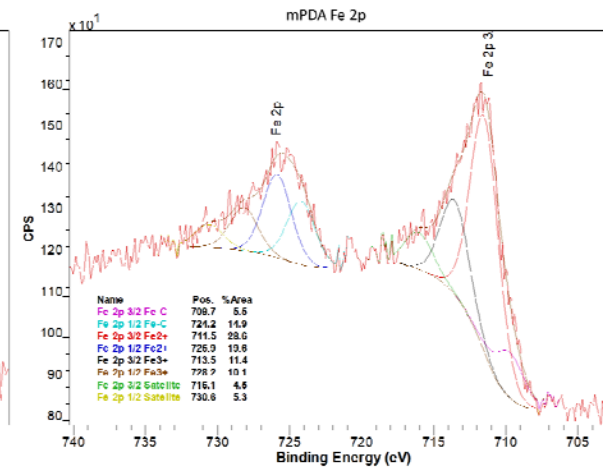

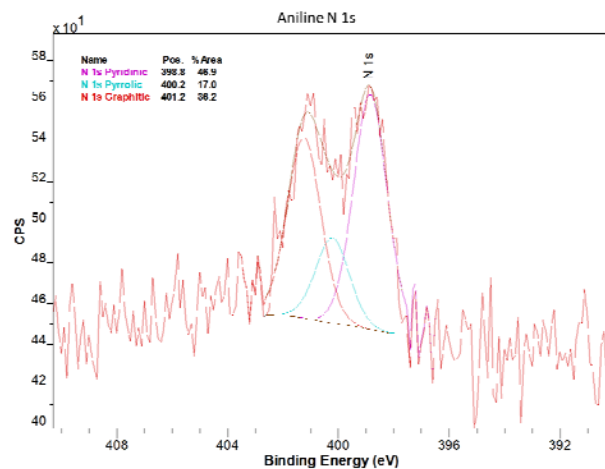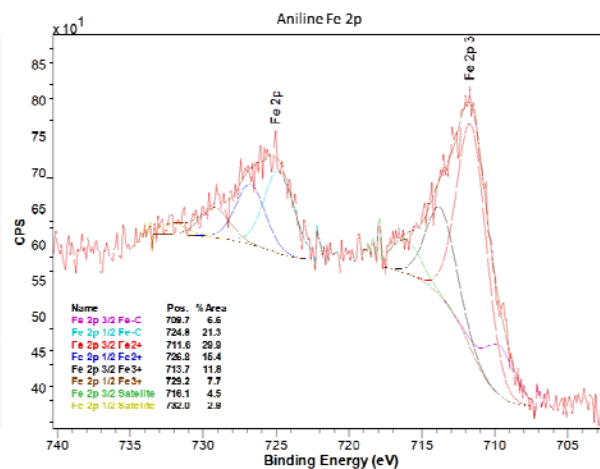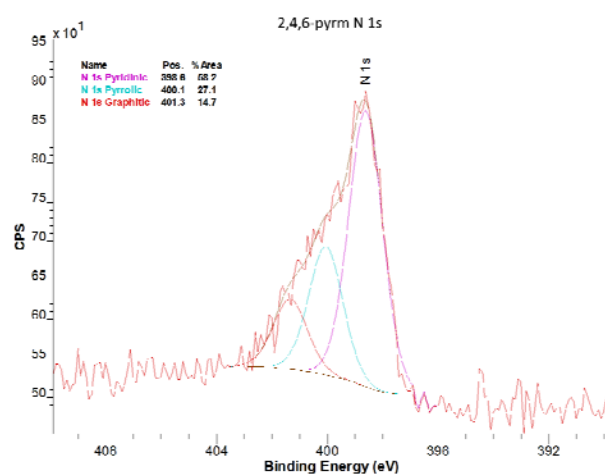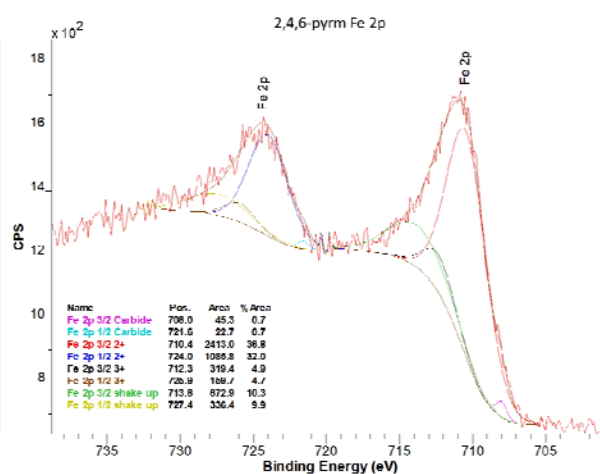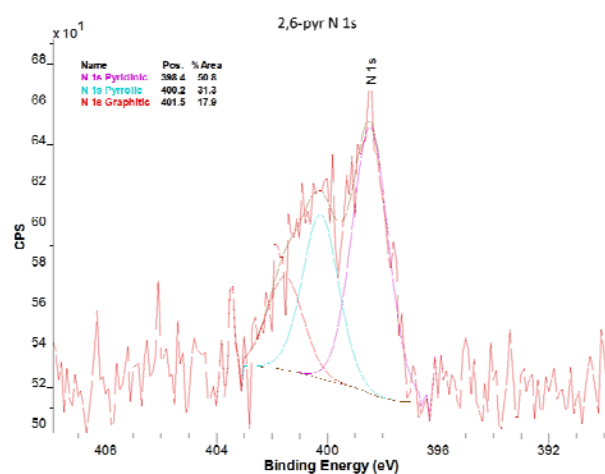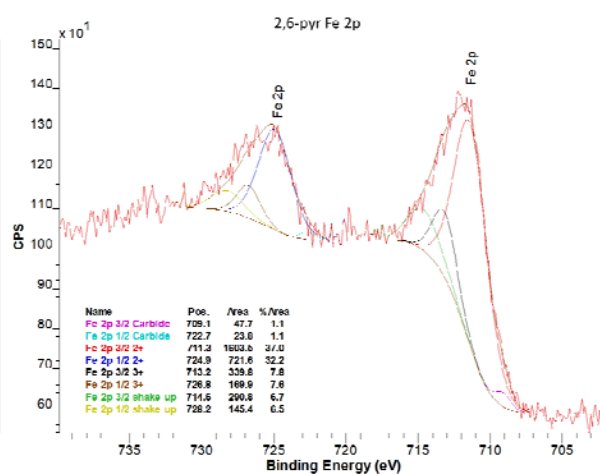

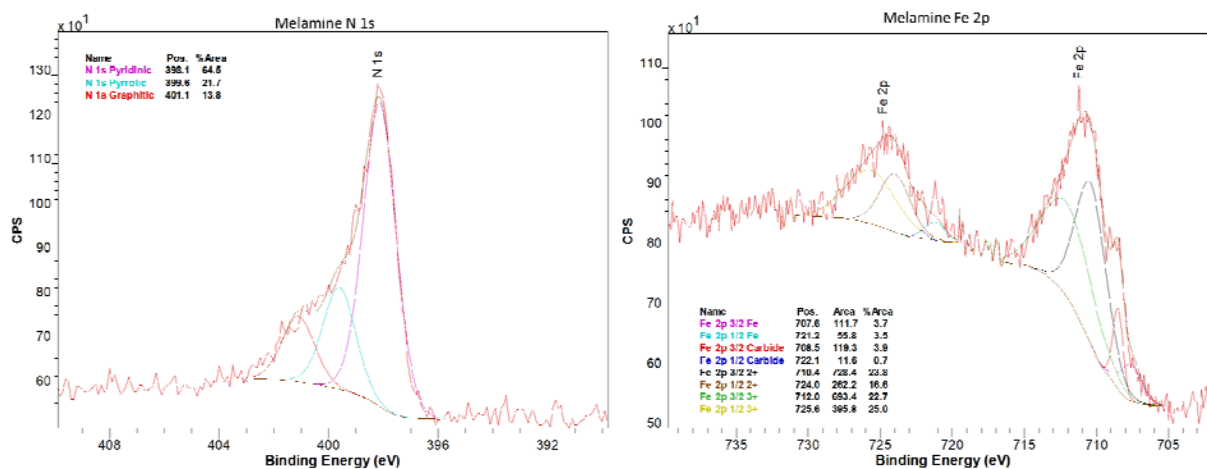

**Figure S3:** XPS Fe 2*p* and N 1*s* spectra of selected Fe<sub>3</sub>C products from different amine precursors.
